# Supplementary material for: HEART rate variability biofeedback for LOng Covid symptoms (HEARTLOC): protocol for a feasibility study
Source: medRxiv preprint, doi:10.1101/2022.06.23.22276821, version 1 (2022-06-27)
Supplement: Supplementary File 1 [file 276821_file02.docx]

**Modified COVID-19 Yorkshire Rehabilitation Scale (C19-YRSm)**

**Self-report version**

Patient name:

Hospital number:

Date: Time:

*The purpose of this questionnaire is to find out more about your current problems following COVID-19 illness. Your responses will be recorded in your clinical notes. We will use this information to monitor your symptoms, offer treatments and assess your response to treatment.*

*This questionnaire will take around 10 minutes. If there are any topics you don’t want to talk about you can choose not to respond.*

*Do you consent for this information to be used for audit and research as well?* **Yes** ☐ **No** ☐

**SYMPTOM SEVERITY**

| *Please answer the questions below to the best of your knowledge.*  ***‘Now’*** *refers to how you feel now/this week (last 7 days).*  ***“Pre-COVID”*** *refers to how you were feeling prior to contracting the illness.*  *If you are unable to recall this, just state ‘don’t know’*  *Rate the severity of each problem on a scale of 0-3:*  ***0 = None; no problem***  ***1 = Mild problem; does not affect daily life***  ***2 = Moderate problem; affects daily life to a certain extent***  ***3 = Severe problem; affects all aspects of daily life; life-disturbing*** | | | |
| --- | --- | --- | --- |
| 1. Breathlessness | Breathlessness: | **Now** | **Pre-COVID** |
| 1. At rest | **0** ☐ **1** ☐ **2** ☐ **3** ☐ | **0** ☐ **1** ☐ **2** ☐ **3** ☐ |
| 1. Changing position e.g. from lying to sitting or sitting to lying | **0** ☐ **1** ☐ **2** ☐ **3** ☐ | **0** ☐ **1** ☐ **2** ☐ **3** ☐ |
| 1. On dressing yourself | **0** ☐ **1** ☐ **2** ☐ **3** ☐ | **0** ☐ **1** ☐ **2** ☐ **3** ☐ |
| 1. On walking up a flight of stairs | **0** ☐ **1** ☐ **2** ☐ **3** ☐ | **0** ☐ **1** ☐ **2** ☐ **3** ☐ |
| 2. Cough/ throat sensitivity/ voice change | Cough/ throat sensitivity | **0** ☐ **1** ☐ **2** ☐ **3** ☐ | **0** ☐ **1** ☐ **2** ☐ **3** ☐ |
| Change of voice | **0** ☐ **1** ☐ **2** ☐ **3** ☐ | **0** ☐ **1** ☐ **2** ☐ **3** ☐ |
| 3. Fatigue (tiredness not improved by rest) | Fatigue levels in your usual activities | **0** ☐ **1** ☐ **2** ☐ **3** ☐ | **0** ☐ **1** ☐ **2** ☐ **3** ☐ |
| 4. Smell/taste | Altered smell | **0** ☐ **1** ☐ **2** ☐ **3** ☐ | **0** ☐ **1** ☐ **2** ☐ **3** ☐ |
| Altered taste | **0** ☐ **1** ☐ **2** ☐ **3** ☐ | **0** ☐ **1** ☐ **2** ☐ **3** ☐ |
| 5. Pain/discomfort | Chest pain | **0** ☐ **1** ☐ **2** ☐ **3** ☐ | **0** ☐ **1** ☐ **2** ☐ **3** ☐ |
| Joint pain | **0** ☐ **1** ☐ **2** ☐ **3** ☐ | **0** ☐ **1** ☐ **2** ☐ **3** ☐ |
| Muscle pain | **0** ☐ **1** ☐ **2** ☐ **3** ☐ | **0** ☐ **1** ☐ **2** ☐ **3** ☐ |
| Headache | **0** ☐ **1** ☐ **2** ☐ **3** ☐ | **0** ☐ **1** ☐ **2** ☐ **3** ☐ |
| Abdominal pain | **0** ☐ **1** ☐ **2** ☐ **3** ☐ | **0** ☐ **1** ☐ **2** ☐ **3** ☐ |
| 6. Cognition | Problems with concentration | **0** ☐ **1** ☐ **2** ☐ **3** ☐ | **0** ☐ **1** ☐ **2** ☐ **3** ☐ |
| Problems with memory | **0** ☐ **1** ☐ **2** ☐ **3** ☐ | **0** ☐ **1** ☐ **2** ☐ **3** ☐ |
| Problems with planning | **0** ☐ **1** ☐ **2** ☐ **3** ☐ | **0** ☐ **1** ☐ **2** ☐ **3** ☐ |
| 7. Palpitations/ dizziness | Palpitations in certain positions, activity or at rest | **0** ☐ **1** ☐ **2** ☐ **3** ☐ | **0** ☐ **1** ☐ **2** ☐ **3** ☐ |
| Dizziness in certain positions, activity or at rest | **0** ☐ **1** ☐ **2** ☐ **3** ☐ | **0** ☐ **1** ☐ **2** ☐ **3** ☐ |
| 8. Post-exertional malaise (worsening of symptoms) | Crashing or relapse hours or days after physical, cognitive or emotional exertion | **0** ☐ **1** ☐ **2** ☐ **3** ☐ | **0** ☐ **1** ☐ **2** ☐ **3** ☐ |
| 9. Anxiety/ mood | Feeling anxious | **0** ☐ **1** ☐ **2** ☐ **3** ☐ | **0** ☐ **1** ☐ **2** ☐ **3** ☐ |
| Feeling depressed | **0** ☐ **1** ☐ **2** ☐ **3** ☐ | **0** ☐ **1** ☐ **2** ☐ **3** ☐ |
| Having unwanted memories of your illness or time in hospital | **0** ☐ **1** ☐ **2** ☐ **3** ☐ | **0** ☐ **1** ☐ **2** ☐ **3** ☐ |
| Having unpleasant dreams about your illness or time in hospital | **0** ☐ **1** ☐ **2** ☐ **3** ☐ | **0** ☐ **1** ☐ **2** ☐ **3** ☐ |
| Trying to avoid thoughts or feelings about your illness or time in hospital | **0** ☐ **1** ☐ **2** ☐ **3** ☐ | **0** ☐ **1** ☐ **2** ☐ **3** ☐ |
| 10. Sleep | Sleep problems, such as difficulty falling asleep, staying asleep or oversleeping | **0** ☐ **1** ☐ **2** ☐ **3** ☐ | **0** ☐ **1** ☐ **2** ☐ **3** ☐ |

**FUNCTIONAL ABILITY**

| 11. Communication | Difficulty with communication/word finding difficulty/understanding others | **Now** | **Pre-COVID** |
| --- | --- | --- | --- |
| **0** ☐ **1** ☐ **2** ☐ **3** ☐ | **0** ☐ **1** ☐ **2** ☐ **3** ☐ |
| 12. Walking or moving around | Difficulties with walking or moving around | **0** ☐ **1** ☐ **2** ☐ **3** ☐ | **0** ☐ **1** ☐ **2** ☐ **3** ☐ |
| 13. Personal care | Difficulties with personal tasks such as using the toilet or getting washed and dressed | **0** ☐ **1** ☐ **2** ☐ **3** ☐ | **0** ☐ **1** ☐ **2** ☐ **3** ☐ |
| 14. Other activities of Daily Living | Difficulty doing wider activities, such as household work, leisure/sporting activities, paid/unpaid work, study or shopping | **0** ☐ **1** ☐ **2** ☐ **3** ☐ | **0** ☐ **1** ☐ **2** ☐ **3** ☐ |
| 15. Social role | Problems with socialising/interacting with friends* or caring for dependants  *related to your illness and not due to social distancing/lockdown measures | **0** ☐ **1** ☐ **2** ☐ **3** ☐ | **0** ☐ **1** ☐ **2** ☐ **3** ☐ |

**OTHER SYMPTOMS**

| Please select any of the following symptoms you have experienced since your illness in the last 7 days. Please also select any previous problems that have worsened for you following your illness.  ☐ Fever  ☐ Skin rash/ discolouration of skin  ☐ New allergy such as medication, food etc  ☐ Hair loss  ☐ Skin sensation (numbness/tingling/itching/nerve pain)  ☐ Dry eyes/ redness of eyes  ☐ Swelling of feet/ swelling of hands  ☐ Easy bruising/ bleeding  ☐ Visual changes  ☐ Difficulty swallowing solids  ☐ Difficulty swallowing liquids  ☐ Balance problems or falls  ☐ Weakness or movement problems or coordination problems in limbs  ☐ Tinnitus  ☐ Nausea  ☐ Dry mouth/mouth ulcers  ☐ Acid Reflux/heartburn  ☐ Change in appetite  ☐ Unintentional weight loss  ☐ Unintentional weight gain  ☐ Bladder frequency,urgency or incontinence  ☐ Constipation, diarrhoea or bowel incontinence  ☐ Change in menstrual cycles or flow  ☐ Waking up at night gasping for air (also called sleep apnea)  ☐ Thoughts about harming yourself  Other symptoms – free text |
| --- |

**OVERALL HEALTH**

| How good or bad is your health overall in the last 7 days?  For this question, a score of 10 means the BEST health you can imagine. 0 means the WORST health you can imagine.  a) Now:  WORST HEALTH  0 ☐ 1 ☐ 2 ☐ 3 ☐ 4 ☐ 5 ☐ 6 ☐ 7 ☐ 8 ☐ 9 ☐ 10 ☐ BEST HEALTH  b) Pre-Covid:  WORST HEALTH  0 ☐ 1 ☐ 2 ☐ 3 ☐ 4 ☐ 5 ☐ 6 ☐ 7 ☐ 8 ☐ 9 ☐ 10 ☐ BEST HEALTH |
| --- |

**EMPLOYMENT**

| Occupation: ______________________  Has your COVID-19 illness affected your work?  ☐ No change  ☐ On reduced working hours  ☐ On sickness leave  ☐ Changes made to role/ working arrangements (such as working from home or lighter duties)  ☐ Had to retire/ change job  ☐ Lost job  Any other comments/concerns:_____________________________________________ |
| --- |

**PARTNER/FAMILY/CARER PERSPECTIVE**

| This is space for your partner, family or carer to add anything from their perspective: |
| --- |
